# Supplementary material for: Ligand–protein target screening from cell matrices using reactive desorption electrospray ionization-mass spectrometry via a native-denatured exchange approach
Source: Royal Society of Chemistry journal article supplement (doi:10.1039/c8an01708e), 2018-11-22

# **Ligand-Protein Target Screening from Cell Matrices Using Reactive Desorption Electrospray Ionization-Mass Spectrometry via a Native Denatured Exchange Approach**

Qiuling Zheng<sup>1,2,†</sup>, Xujun Ruan<sup>1,†</sup>, Yang Tian<sup>1</sup>, Jiaojiao Hu<sup>2</sup>, Ning Wan<sup>1</sup>, Wenjie Lu<sup>1</sup>,

Xiaowei Xu<sup>1</sup>, Guangji Wang<sup>1</sup>, Haiping Hao<sup>1,\*</sup>, Hui Ye<sup>1,\*</sup>

<sup>1</sup> Key Laboratory of Drug Metabolism and Pharmacokinetics, State Key Laboratory of Natural Medicines, <sup>2</sup> Department of Pharmaceutical Analysis, College of Pharmacy, China Pharmaceutical University, Tongjiaxiang #24, Nanjing, Jiangsu, 210009, China

\* Correspondence: [cpuyehui@cpu.edu.cn](mailto:cpuyehui@cpu.edu.cn) (H. Y.), Tel: 86-25-83271191  
[haipinghao@cpu.edu.cn](mailto:haipinghao@cpu.edu.cn) (H.H.), Tel: 86-25-83271179

<sup>†</sup>These authors contributed equally to this work.

## Supplemental Methods

### Calculation of ligand-target protein binding metrics

The holo/apo ratio is defined as the relative abundance of the bound versus unbound proteins. Consequently, we calculate this metric by dividing the summed intensities of the complex ions at all charge states (denoted by [PL]) by the sum of the intensities of unbound protein ions (denoted by [P]) of all charge states based on the deconvoluted spectra.

$$R = \frac{[PL]_{eq}}{[P]_{eq}} = \frac{\sum_n Ab(PL^{n+})}{\sum_n Ab(P^{n+})}$$

Subsequently,  $K_d$  (dissociation constant) is further acquired by a direct ESI-MS deduced by the Klassen group using the equation shown below.  $[P]_0$  and  $[L]_0$  refer to the initial concentration of protein and ligand prepared as solution

$$K_a = \frac{1}{K_d} = \frac{R}{[L]_0 - \frac{R}{1+R}[P]_0}$$

**Table S1.** Holo/apo ratios and the corresponding  $K_d$  values calculated based on a direct ESI-MS model for the complexes formed between RNase A and nine ligand candidates.

|                   | <b>CTP</b> | <b>CDP</b> | <b>CMP</b> | <b>ADP</b> | <b>AMP</b> | <b>UMP</b> | <b>ChA</b> | <b>Cytidine</b> | <b>Dox</b> |
|-------------------|------------|------------|------------|------------|------------|------------|------------|-----------------|------------|
| Holo/apo          | 1.317      | 0.343      | 0.157      | 0.790      | 0.283      | 0.050      | 0.724      | 0.000           | 0.000      |
| $K_d/\mu\text{M}$ | 21.740     | 101.726    | 237.491    | 39.460     | 125.754    | 780.952    | 43.648     | $\infty$        | $\infty$   |

$[P]_0 = 20 \mu\text{M}$ ,  $[L]_0 = 40 \mu\text{M}$ .

**Table S2.** The values of  $K_d$  measured for the complexes formed between target proteins and candidate ligands by MST. The original data is partially recorded in ref[13].

| <b>Complexes</b> | <b><math>K_d</math></b>      |
|------------------|------------------------------|
| Ubiquitin-NAG3   | NA (no binding)              |
| Ubiquitin-CDP    | NA (no binding)              |
| RNase A-NAG3     | NA (no binding)              |
| Lysozyme-NAG3    | $28.50 \pm 5.37 \mu\text{M}$ |
| RNase A-CTP      | $0.52 \pm 0.02 \mu\text{M}$  |

**Figure S1.** Total ion chromatogram (TIC) of (A) pure lysozyme, (B) lysozyme spiked in HCT116 cell lysate, (C) RNase A and (D) RNase A spiked in cell lysate separated by size exclusion chromatography (SEC). The final concentration of spiked target protein in each fraction is estimated as 20  $\mu$ M.

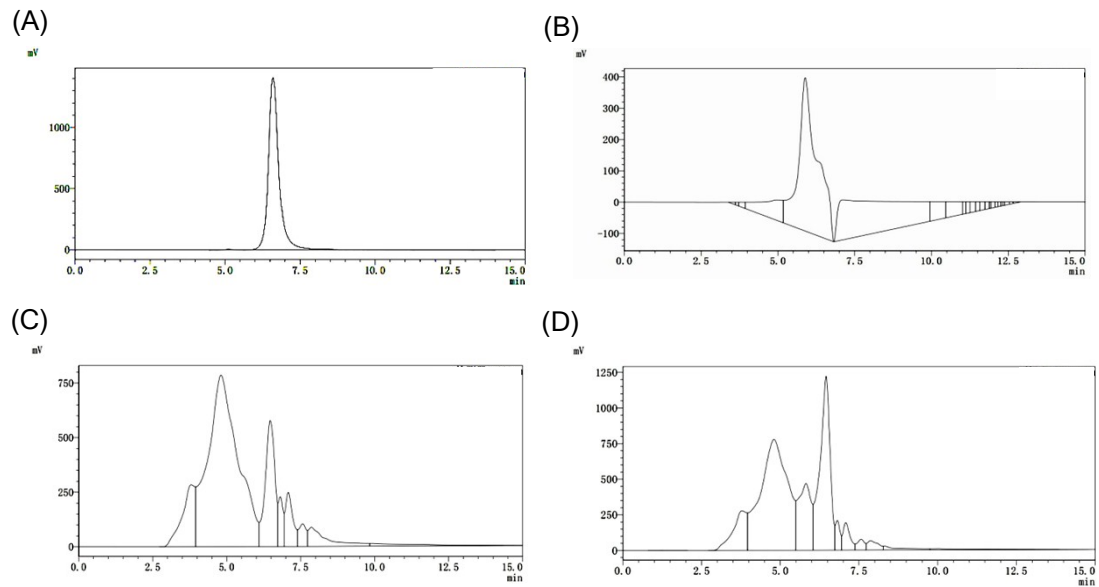

**Figure S2.** MS spectra of formed protein complex of (A) lysozyme-ligand mix; and (B) lysozyme-ligand mix, detected under various DESI spray solvent compositions.

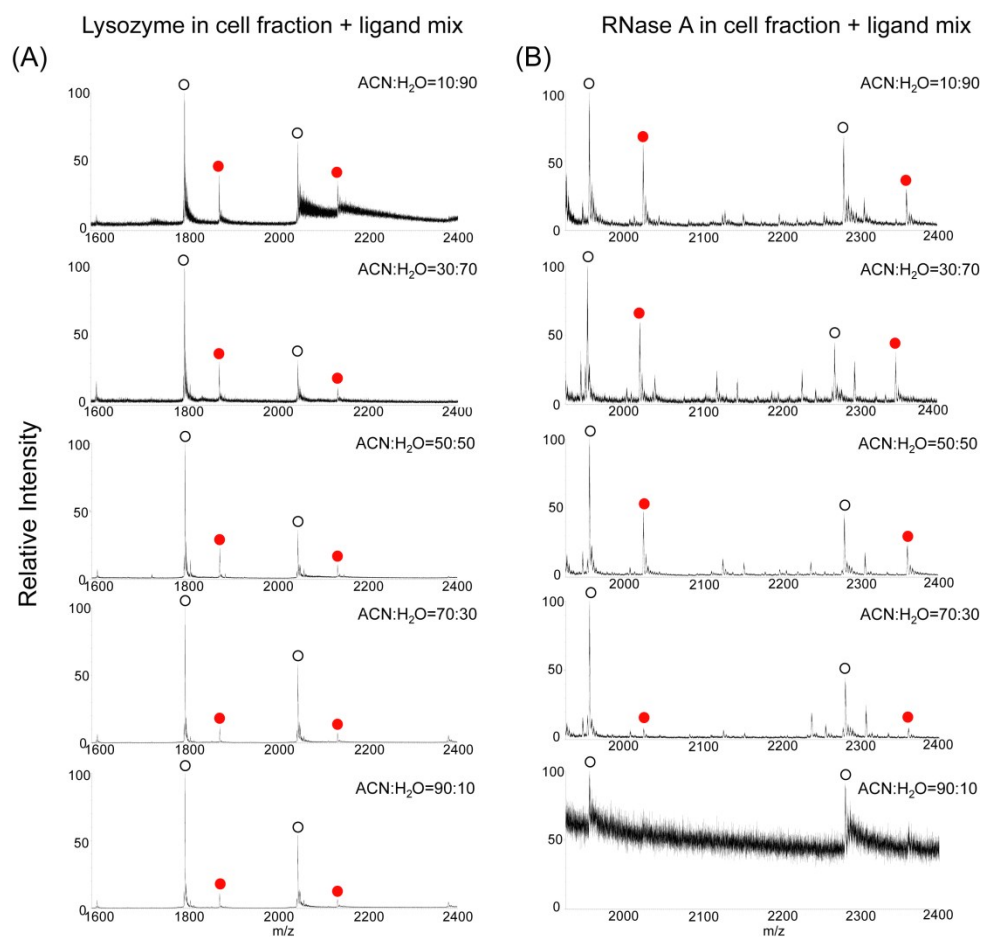

Supplement: c8an01708e1.pdf [file c8an01708e1.pdf]
